# Supplementary material
Source: PubMed Central journal article supplement (PMC4874895)
Supplement: NIHMS781221-supplement-Supplementary_Information.pdf [file NIHMS781221-supplement-Supplementary_Information.pdf]

## SUPPORTING INFORMATION

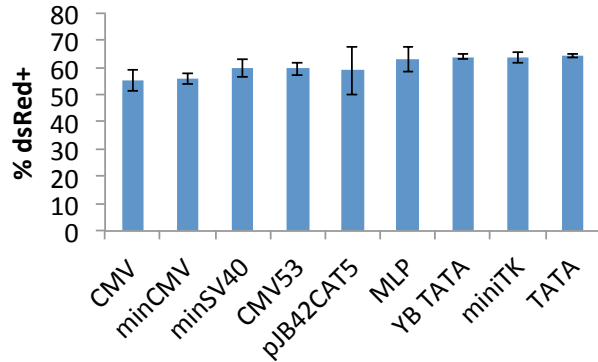

**Figure S1.** The panel of core promoter constructs has similar transfection efficiencies in HEK 293T cells. Plasmids encoding different core promoters as shown in Figure 1 were transiently transfected into HEK 293T cells. DsRed-Express fluorescence was quantified by flow cytometry, and the percent of viable singlets that express dsRed-Express were determined by population gating. Values shown are the means of triplicates with error bars indicating  $\pm 1$  s.d.

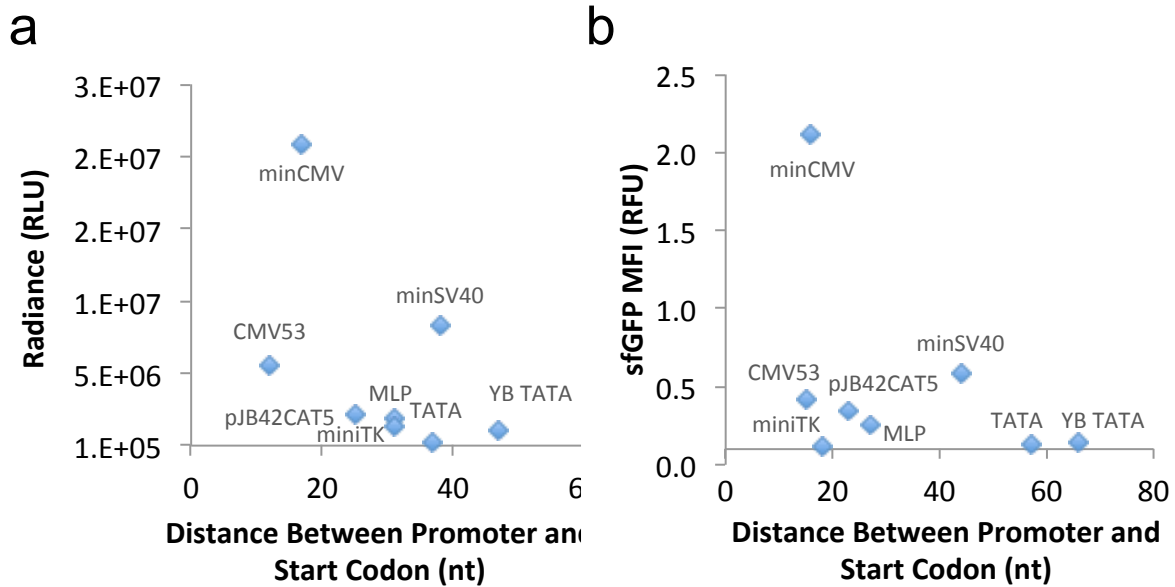

**Figure S2.** Variation in basal expression level from core promoters is not an artifact of plasmid cloning. Each core promoter was cloned into the same plasmid backbone, but the cloning process resulted in variations in the number of nucleotides between the end of each promoter and the start codon. Plasmids encoding (a) Gluc or (b) sfGFP show basal expression levels that do not correlate with the distance between the promoter and the start codon on each plasmid.

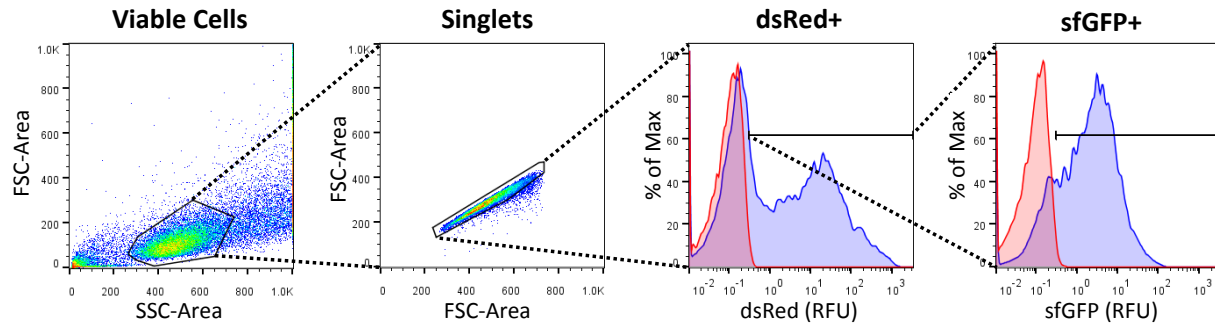

**Figure S3.** Population gating strategy for flow cytometry data. Cells were first gated for viability based on side scatter (SSC) and forward scatter (FSC). The singlet gate removed cell clusters. Transfected cells were gated based on dsRed expression, since all plasmids used in transient transfection experiments in this study contained dsRed expressed from a constitutive CMV promoter. Finally, reporter-expressing cells among transfected cells were identified within the sfGFP+ gate among viable/singlet/dsRed+ cells.

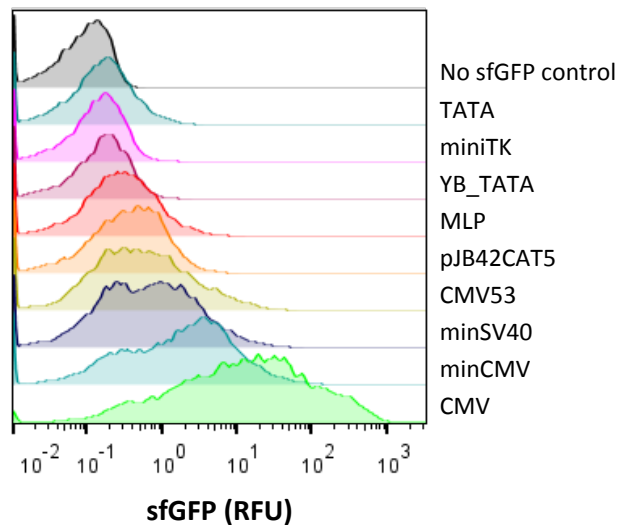

**Figure S4.** Gene expression by core promoters in the uninduced state. HEK 293T cells transiently transfected with plasmids encoding sfGFP expressed from various core promoters without response elements were analyzed by flow cytometry. The intensity of sfGFP fluorescence is shown for the viable/singlet/dsRed+ population.

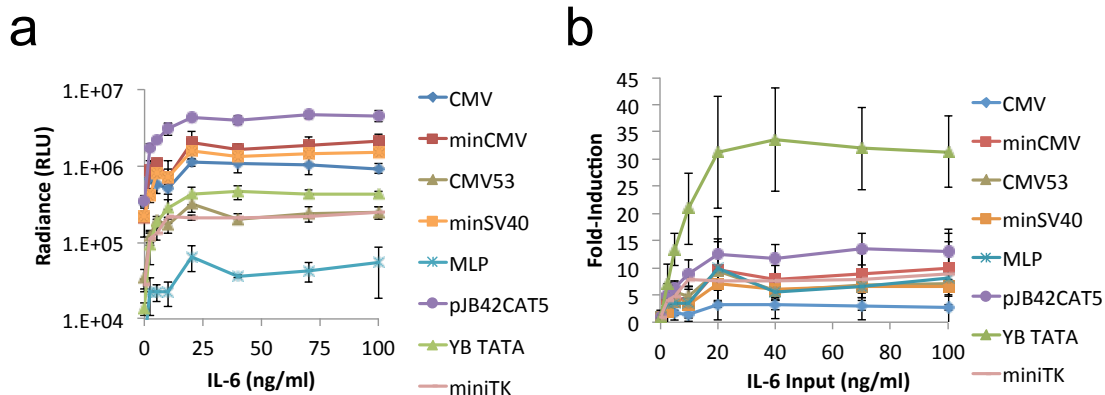

**Figure S5.** Gluc output and fold-induction of IL-6-responsive transcription systems in transiently transfected HEK 293T cells. The panel of core promoters was coupled to four copies of the IL-6-responsive JRE-IL6 response element to drive the expression of Gluc. (a) Gluc activity in the supernatant of cells cultured with various concentrations of IL-6. (b) Fold-induction in Gluc activity (normalized to 0 ng/ml IL-6 input). Values shown are the means of triplicates with error bars indicating  $\pm 1$  s.d.

**Table S1. Core Promoter Sequences**

| Promoter  | Sequence                                                                                                                                                                                                                     |
|-----------|------------------------------------------------------------------------------------------------------------------------------------------------------------------------------------------------------------------------------|
| minCMV    | GTAGGCGTGTACGGTGGGAGGTCTATATAAGCAGAGCTCGTTTAGTG<br>AACCGTCAGATC <sup>a</sup>                                                                                                                                                 |
| CMV53     | CAACAAAATGTCGTAACAAGGGCGGTAGGCGTGTACGGTGGGAGGT<br>CTATATAAGCAGAGCTCGTTTAGTGAACCG <sup>b</sup>                                                                                                                                |
| minSV40   | TGCATCTCAATTAGTCAGCAACCATAGTCCCGCCCCTAACTCCGCCCCA<br>TCCCGCCCCTAACTCCGCCCAGTTCCGCCCATTCTCCGCCCCATCGCT<br>GACTAATTTTTTTTATTTATGCAGAGGCCGAGGCCGCCTCGGCCTCT<br>GAGCTATTCCAGAAGTAGTGAGGAGGCTTTTTTGGAGGCCTAGGCTT<br>TTGCAAAAAGCTT |
| miniTK    | TTCGCATATTAAGGTGACGCGTGTGGCCTCGAACACCGAGCGACCCT<br>GCAGCGACCCGCTTAA                                                                                                                                                          |
| MLP       | GGGGGGCTATAAAAGGGGGTGGGGGCGTTCGTCCTCACTCT                                                                                                                                                                                    |
| pJB42CAT5 | CTGACAAATTCAGTATAAAAGCTTGGGGCTGGGGCCGAGCACTGGG<br>GACTTTGAGGGTGGCCAGGCCAGCGTAGGAGGCCAGCGTAGGATCCT<br>GCTGGGAGCGGGAACTGAGGGAAGCGACGCCGAGAAAGCAGGCGT<br>ACCACGGAGGGAGAGAAAAGCTCCGGAAGCCCAGCAGCG <sup>c</sup>                   |
| YB_TATA   | TCTAGAGGGTATATAATGGGGGCCA                                                                                                                                                                                                    |
| TATA      | TATAAAAG                                                                                                                                                                                                                     |

<sup>a</sup>Bold letters indicate the TATA box consensus sequence.

<sup>b</sup>Underlined letters indicate the GC box consensus sequence.

<sup>c</sup>Blue letters indicate an additional B-recognition element found in pJB42CAT5.<sup>1</sup>

#### Reference:

- [1] Lagrange, T., Kapanidis, A. N., Tang, H., Reinberg, D., and Ebright, R. H. (1998) New core promoter element in RNA polymerase II-dependent transcription: sequence-specific DNA binding by transcription factor IIB, *Genes Dev* 12, 34-44.

## Supplementary Text 1. Plasmid Sequence for YB\_TATA-Gluc

```
1 GACGGATCGG GAGATCTTCG CGATTAATTA ATCCATATGC TCTAGAGGGT ATATAATGGG
61 GGCCACTAGT CTA CTACTACCAG AAAGCTTGGT ACCGAGCTCG GATCCAGCCA CCATGGGAGT
121 CAAAGTTCTG TTTGCCCTGA TCTGCATCGC TGTGGCCGAG GCCAAGCCCA CCGAGAACAA
181 CGAAGACTTC AACATCGTGG CCGTGGCCAG CAACTTCGCG ACCACGGATC TCGATGCTGA
241 CCGCGGGAAG TTGCCCGGCA AGAAGCTGCC GCTGGAGGTG CTCAAAGAGA TGAAGCCAA
301 TGCCCGGAAA GCTGGCTGCA CCAGGGGCTG TCTGATCTGC CTGTCCCACA TCAAGTGCAC
361 GCCCAAGATG AAGAAGTTCA TCCCAGGACG CTGCCACACC TACGAAGGCG ACAAAGAGTC
421 CGCACAGGGC GGCATAGGCG AGGCGATCGT CGACATTCCT GAGATTCCTG GGTTC AAGGA
481 CTTGGAGCCC ATGGAGCAGT TCATCGCACA GGTTCGATCTG TGTGTGGACT GCACA ACTGG
541 CTGCCTCAA GGGCTTGCCA ACGTGCAGTG TTCTGACCTG CTCAAGAAGT GGCTGCCGCA
601 ACGCTGTGCG ACCTTGCCA GCAAGATCCA GGGCCAGGTG GACAAGATCA AGGGGGCCGG
661 TGGTACTAA GCGGCCGCT AGAGGGCCCG TTTAAACCCG CTGATCAGCC TCGACTGTGC
721 CTTCTAGTTG CCAGCCATCT GTTGTGGCC CCTCCCCGT GCCTTCCTTG ACCCTGGAAG
781 GTGCCACTCC CACTGTCCTT TCCTAATAAA ATGAGGAAAT TGCATCGCAT TGCTGAGTA
841 GGTGTCATTC TATTCTGGG GGTGGGGTGG GGCAGGACAG CAAGGGGGAG GATTGGGAAG
901 ACAATAGCAG GCATGCTGGG GATGCGGTGG GCTCTATGGC CGCGGAATTA GCCTATGTTT
961 TTTGGAACAA TTGCATGAAG AATCTGCTTA GGGTTAGGCG TTTTGCCTG CTTCGCGATG
1021 TACGGGCCAG ATATACGCGT TGACATTGAT TATTGACTAG TTATTAATAG TAATCAATTA
1081 CGGGGTCATT AGTTCATAGC CCATATATGG AGTTCGCGT TACATAACTT ACGGTAATG
1141 GCGCCCTGG CTGACCGCC AACGACCCC GCCATTGAC GTCAATAATG ACGTATGTTC
1201 CCATAGTAAC GCCAATAGGG ACTTTCCATT GACGTCAATG GGTGGAGTAT TTACGGTAAA
1261 CTGCCACTT GGCAGTACAT CAAGTGTATC ATATGCCAAG TACGCCCCCT ATTGACGTCA
1321 ATGACGGTAA ATGGCCCGCC TGGCATTATG CCCAGTACAT GACCTTATGG GACTTCCCTA
1381 CTTGGCAGTA CATCTACGTA TTAGTCATCG CTATTACCAT GGTGATGCGG TTTTGGCAGT
1441 ACATCAATGG GCGTGGATAG CGGTTTACT CACGGGGATT TCCAAGTCTC CACCCATG
1501 ACGTCAATGG GAGTTTGT TGGACCAA ATCAACGGGA CTTTCCAAA TGTCGTAACA
1561 ACTCCGCCCC ATTGACGCAA ATGGGCGGTA GCGGTGTACG GTGGGAGGTC TATAAAGCA
1621 GAGCTCTCTG GCTAACTAGA GAACCACTG CTTACTGGCT TATCGAAATT AATACGACTC
1681 ACTATAGGGA GACCAAGCT GGCTAGCCGC CACCATGGCC TCCTCCGAGG ACGTCATCAA
1741 GGAGTTCATG CGCTTCAAG TGCGCATGGA GGGCTCCGTG AACGGCCACG AGTTCGAGAT
1801 CGAGGGCGAG GGCGAGGGCC GCCCTACGA GGGCACCCAG ACCGCCAAGC TGAAGGTGAC
1861 CAAGGGCGGC CCCCTGCCCT TCGCCTGGGA CATCCTGTCC CCCAGTTCC AGTACGGCTC
1921 CAAGGTGTAC GTGAAGCACC CCGCCGACAT CCCCGACTAC AAGAAGCTGT CCTTCCCCGA
1981 GGGCTTCAAG TGGGAGCGCG TGATGAACTT CGAGGACGGC GCGGTGGTGA CCGTGACCCA
2041 GGA CTCTCC CTGCAGGAC GCTCCTTCAT CTACAAGGTG AAGTTCATCG GCGTGA ACTT
2101 CCCCTCCGAC GGCCCCGTAA TGCAGAAGAA GACTATGGGC TGGGAGGCCT CCACCGAGCG
2161 CCTGTACCCC CGCGACGGCG TGCTGAAGGG CGAGATCCAC AAGGCCCTGA AGCTGAAGGA
2221 CGGCGGCCAC TACCTGGTGG AGTTCAAGTC CATCTACATG GCCAAGAAGC CCGTGCAGCT
2281 GCGCGCTAC TACTACGTGG ACTCCAAGCT GGACATCACC TCCCACAACG AGGACTACAC
2341 CATCGTGGAG CAGTACGAGC GCGCCGAGGG CCGCCACCAC CTGTTCTGT AGACGGCTGT
2401 TTA AACCCG TGATCAGCCT CGACTGTGCC TTCTAGTTGC CAGCCATCTG TTGTTGCCC
2461 CTCCCCGTG CCTTCCTGA CCCTGGAAGG TGCCACTCCC ACTGTCCTTT CTAATAAAAA
2521 TGAGGAAATT GCATCGCATT GTCTGAGTAG GTGTCATCT ATTCTGGGGG GTGGGGTGGG
2581 GCAGGACAGC AAGGGGAGG ATTGGGAAGA CAATAGCAGG CATGCTGGGG ATGCGGTGGG
2641 CTCTATGGCT TCTGAGGCG AAAGAACCAG CTGGGGCTCT AGGGGGTATC CCCACGCGCC
2701 CTGTAGCGGC GCATTAAGCG CGGCGGGTGT GGTGGTTACG CGCAGCGTGA CCGCTACACT
```

2761 TGCCAGCGCC CTAGCGCCCG CTCCTTTCGC TTTCTTCCCT TCCTTTCTCG CCACGTTTCGC  
2821 CGGCTTTCCC CGTCAAGCTC TAAATCGGGG GCTCCCTTTA GGGTTCCGAT TTAGTGCTTT  
2881 ACGGCACCTC GACCCCAAAA AACTTGATTA GGGTGATGGT TCACGTAGTG GGCCATCGCC  
2941 CTGATAGACG GTTTTTCGCC CTTTGACGTT GGAGTCCACG TTCTTTAATA GTGGACTCTT  
3001 GTTCCAAACT GGAACAACAC TCAACCCTAT CTCGGTCTAT TCTTTTGATT TATAAGGGAT  
3061 TTTGCCGATT TCGGCCTATT GGTAAAAAAA TGAGCTGATT TAACAAAAAT TTAACGCGAA  
3121 TTAATTCTGT GGAATGTGTG TCAGTTAGGG TGTGAAAGT CCCCAGGCTC CCCAGCAGGC  
3181 AGAAGTATGC AAAGCATGCA TCTCAATTAG TCAGCAACCA GGTGTGAAA GTCCCCAGGC  
3241 TCCCAGCAG GCAGAAGTAT GCAAAGCATG CATCTCAATT AGTCAGCAAC CATAGTCCC  
3301 CCCCTAACTC CGCCCATCCC GCCCTAACT CCGCCAGTT CCGCCATTC TCCGCCCAT  
3361 GGCTGACTAA TTTTTTTTAT TTATGCAGAG GCCGAGGCCG CCTCTGCCTC TGAGCTATTC  
3421 CAGAAGTAGT GAGGAGGCTT TTTTGAGGC CTAGGCTTTT GCAAAAAGCT CCCGGGAGCT  
3481 TGTATATCCA TTTTCGGATC TGATCAAGAG ACAGGATGAG GATCGTTTCG CATGATTGAA  
3541 CAAGATGGAT TGCACGCAGG TTCTCCGGCC GCTTGGGTGG AGAGGCTATT CGGCTATGAC  
3601 TGGGCACAAC AGACAATCGG CTGCTCTGAT GCCGCCGTGT TCCGGCTGTC AGCGCAGGGG  
3661 CGCCCGGTTT TTTTTGTCAA GACCGACCTG TCCGGTGCCC TGAATGAACT GCAGGACGAG  
3721 GCAGCGCGGC TATCGTGGCT GGCCACGACG GGCGTTCCTT GCGCAGCTGT GCTCGACGTT  
3781 GTCACTGAAG CGGGAAGGGA CTGGCTGCTA TTGGGCGAAG TGCCGGGGCA GGATCTCCTG  
3841 TCATCTCACC TTGCTCCTGC CGAGAAAGTA TCCATCATGG CTGATGCAAT GCGGCGGCTG  
3901 CATAAGCTTG ATCCGGCTAC CTGCCATTC GACCACCAAG CGAAACATCG CATCGAGCGA  
3961 GCACGTACTC GGATGGAAGC CGGTCTTGTC GATCAGGATG ATCTGGACGA AGAGCATCAG  
4021 GGGCTCGCGC CAGCCGAACT GTTCGCCAGG CTCAAGGCGC GCATGCCCGA CGGCGAGGAT  
4081 CTCGTCTGTA CCCATGGCGA TGCCTGCTTG CCGAATATCA TGGTGGAAA TGGCCGCTTT  
4141 TCTGGATTCA TCGACTGTGG CCGGCTGGGT GTGGCGGACC GCTATCAGGA CATAGCGTTG  
4201 GCTACCCGTG ATATTGCTGA AGAGCTTGGC GGCGAATGGG CTGACCGCTT CCTCGTGCTT  
4261 TACGGTATCG CCGCTCCCGA TTTCGAGCGC ATCGCCTTCT ATCGCCTTCT TGACGAGTTC  
4321 TTCTGAGCGG GACTCTGGGG TTCGAAATGA CCGACCAAGC GACGCCAAC CTGCCATCAC  
4381 GAGATTTCGA TTCCACCGCC GCCTTCTATG AAAGTTGGG CTTCCGAATC GTTTTCCGGG  
4441 ACGCCGGCTG GATGATCCTC CAGCGCGGGG ATCTCATGCT GGAGTTCTTC GCCACCCCA  
4501 ACTTGTTTTAT TGCAGCTTAT AATGGTTACA AATAAAGCAA TAGCATCACA AATTTACAAA  
4561 ATAAAGCATT TTTTTCACCT CATTCTAGTT GTGGTTTGTG CAAACTCATC AATGTATCTT  
4621 ATCATGTCTG TATACCGTCG ACCTCTAGCT AGAGCTTGGC GTAATCATGG TCATAGCTGT  
4681 TTCTGTGTG AAATTGTTAT CCGCTCACAA TTCCACAAA CATAAGGACC GGAAGCATAA  
4741 AGTGTAAGC CTGGGGTGCC TAATGAGTGA GCTAACTCAC ATTAATTGCG TTGCGCTCAC  
4801 TGCCCGCTTT CCAGTCGGGA AACCTGTCGT GCCAGCTGCA TTAATGAATC GGCCAACGCG  
4861 CGGGGAGAGG CGGTTTGCGT ATTTGGGCGCT CTTCCGCTTC CTCGCTCACT GACTCGCTGC  
4921 GCTCGGTCGT TCGGCTGCGG CGAGCGGTAT CAGCTCACTC AAAGGCGGTA ATACGGTTAT  
4981 CCACAGAATC AGGGGATAAC GCAGGAAAGA ACATGTGAGC AAAAGGCCAG CAAAAGGCCA  
5041 GGAACCGTAA AAAGGCCGCG TTGCTGGCGT TTTTCCATAG GCTCCGCCCC CTTGACGAGC  
5101 ATCACAAAAA TCGACGCTCA AGTCAGAGGT GCGGAAACCC GACAGGACTA TAAAGATACC  
5161 AGGCGTTTCC CCCTGGAAGC TCCCTCGTGC GCTCTCCTGT TCCGACCCTG CCGCTTACCG  
5221 GATACCTGTC CGCCTTTCTC CCTTCGGGAA GCGTGGCGCT TTCTCATAGC TCACGCTGTA  
5281 GGTATCTCAG TTCGGTGTAG GTCGTTGCTT CCAAGCTGGG CTGTGTGCAC GAACCCCCG  
5341 TTCAGCCCGA CCGCTGCGCC TTATCCGGTA ACTATCGTCT TGAGTCCAAC CCGTAAGAC  
5401 ACGACTTATC GCCACTGGCA GCAGCCACTG GTAACAGGAT TAGCAGAGCG AGGTATGTAG  
5461 GCGGTGCTAC AGAGTTCTTG AAGTGGTGGC CTAACACTAG CTACACTAGA AGAACAGTAT  
5521 TTGGTATCTG CGCTCTGCTG AAGCCAGTTA CCTTCGAAA AAGAGTTGGT AGCTCTGAT  
5581 CCGGCAACA AACACCCTG GGTAGCGGTT TTTTTGTTG CAAGCAGCAG ATTACGCGCA

```

5641 GAAAAAAGG ATCTCAAGAA GATCCTTTGA TCTTTTCTAC GGGGTCTGAC GCTCAGTGG
5701 ACGAAAATC ACGTTAAGGG ATTTTGGTCA TGAGATTATC AAAAAGGATC TTCACCTAGA
5761 TCCTTTTAAA TAAAAATGA AGTTTTAAAT CAATCTAAAG TATATATGAG TAAACTTGGT
5821 CTGACAGTTA CCAATGCTTA ATCAGTGAGG CACCTATCTC AGCGATCTGT CTATTTCTGT
5881 CATCCATAGT TGCCTGACTC CCCGTCGTGT AGATAACTAC GATACGGGAG GGCCTACCAT
5941 CTGGCCCCAG TGCTGCAATG ATACCGCGAG ACCCAGCTC ACCGGCTCCA GATTTATCAG
6001 CAATAAACCA GCCAGCCGGA AGGGCCGAGC GCAGAAGTGG TCCTGCAACT TTATCCGCCT
6061 CCATCCAGTC TATTAATTGT TGCCGGGAAG CTAGAGTAAG TAGTTCGCCA GTTAATAGTT
6121 TGCACAACGT TGTTGCCATT GCTACAGGCA TCGTGGTGTG ACGCTCGTCG TTTGGTATGG
6181 CTTTATTAGT CTCCGGTTC CAACGATCAA GCGGAGTTAC ATGATCCCCC ATGTTGTGCA
6241 AAAAAGCGGT TAGCTCCTTC GGTCTCCGA TCGTTGTCAG AAGTAAGTTG GCCGCAGTGT
6301 TATCACTCAT GGTTATGGCA GCACTGCATA ATTCTCTTAC TGTCATGCCA TCCGTAAGAT
6361 GCTTTTCTGT GACTGGTGAG TACTCAACCA AGTCATTCTG AGAATAGTGT ATGCGGCGAC
6421 CGAGTTGCTC TTGCCCGCG TCAATACGGG ATAATACCGC GCCACATAGC AGAACTTAA
6481 AAGTGCTCAT CATTGGAAAA CGTTCTTCGG GCGGAAAACT CCAAGGATC TTACCGCTGT
6541 TGAGATCCAG TTCGATGTAA CCCACTCGTG CACCCAACTG ATCTTCAGCA TCTTTACTT
6601 TCACCAGCGT TTCTGGGTGA GCAAAAACAG GAAGGCAAAA TGCCGCAAAA AAGGAATAA
6661 GGGCGACACG GAAATGTTGA ATACTCATA TCTTCCTTTT TCAATATTAT TGAAGCATTT
6721 ATCAGGGTTA TTGTCTCATG AGCGGATACA TATTTGAATG TATTTAGAAA AATAAACAAA
6781 TAGGGGTTCC GCGCACATTT CCCCAGAAAG TGCCACCTGA CGTC

```

//

```

41..65      Minimal Promoter – YB_TATA
113..670   Gaussia Luciferase
715..939   bGHpA
1039..1596 CMV
1715..2392 dsRed Express
2424..2648 bGHpA
2694..3122 flori
3127..3497 SV40 Early Promoter
3532..4326 NeoR
4500..4631 SV40 PolyA
5684..5013 pUC ori
6688..5828 AmpR
6787..6689 Bla Promoter

```

## Supplementary Text 2. Plasmid Sequence for HREx4-YB\_TATA- Gluc

1 GACGGATCGG GAGATCTTTG TATTTAATTA AGACCTTGAG TACGTGCGTC TCTGCACGTA  
61 TGGCGATTAA GACCTTGAGT ACGTGCCTCT CTGCACGTAT GGCATTAAAG ACCTTGAGTA  
121 CGTGCGTCTC TGCACGTATG GCGATTAAGA CCTTGAGTAC GTGCGTCTCT GCACGTATGG  
181 CGATTAATCC ATATGCTCTA GAGGGTATAT AATGGGGGCC ACTAGTCTAC TACCAGAAAG  
241 CTTGGTACCG AGCTCGGATC CAGCCACCAT GGGAGTCAA GTTCTGTTTG CCCTGATCTG  
301 CATCGCTGTG GCCGAGGCCA AGCCCACCGA GAACAACGAA GACTTCAACA TCGTGGCCGT  
361 GGCCAGCAAC TTCGCGACCA CGGATCTCGA TGCTGACCGC GGAAGTTGC CCGCAAGAA  
421 GCTGCCGCTG GAGGTGCTCA AAGAGATGGA AGCCAATGCC CGGAAAGCTG GCTGCACCAG  
481 GGGCTGTCTG ATCTGCCTGT CCCACATCAA GTGCACGCC AAGATGAAGA AGTTCATCCC  
541 AGGACGCTGC CACACCTACG AAGGCGACAA AGAGTCCGCA CAGGGCGGCA TAGGCGAGGC  
601 GATCGTCGAC ATTCTGAGA TTCCTGGGTT CAAGGACTTG GAGCCCATGG AGCAGTTCAT  
661 CGCACAGGTC GATCTGTGTG TGGACTGCAC AACTGGCTGC CTCAAAGGGC TTGCCAACGT  
721 GCAGTGTCTT GACCTGCTCA AGAAGTGGCT GCCGCAACGC TGTGCGACCT TTGCCAGCAA  
781 GATCCAGGGC CAGGTGGACA AGATCAAGGG GCGCGGTGGT GACTAAGCGG CCGCCTAGAG  
841 GGCCCGTTTA AACCGCTGA TCAGCCTCGA CTGTGCCTTC TAGTTGCCAG CCATCTGTTG  
901 TTTGCCCTC CCCCCTGCCT TCCTTGACCC TGGAAAGTGC CACTCCCCT GTCTTTTCT  
961 AATAAAATGA GGAAATTGCA TCGCATTGTC TGAGTAGGTG TCATTCTATT CTGGGGGGTG  
1021 GGGTGGGGCA GGACAGCAAG GGGGAGGATT GGAAGACAA TAGCAGGCAT GCTGGGGATG  
1081 CGGTGGGCTC TATGGCCGCG GAATTAGCCT ATGTTTTTTG GAACAATTGC ATGAAGAATC  
1141 TGCTTAGGGT TAGGCGTTTT GCGCTGCTTC GCGATGTACG GGCCAGATAT ACGCGTTGAC  
1201 ATTGATTATT GACTAGTTAT TAATAGTAAT CAATTACGGG GTCATTAGTT CATAGCCCAT  
1261 ATATGGAGTT CCGCGTTACA TAACCTACGG TAAATGGCCC GCCTGGCTGA CCGCCAAACG  
1321 ACCCCCGCCC ATTGACGTCA ATAATGACGT ATGTTCCCAT AGTAACGCCA ATAGGGACTT  
1381 TCCATTGACG TCAATGGGTG GAGTATTTAC GGTAAACTGC CCACTTGGCA GTACATCAAG  
1441 TGTATCATAT GCCAAGTACG CCCCCTATTG ACGTCAATGA CGGTAAATGG CCCGCTGGC  
1501 ATTATGCCCA GTACATGACC TTATGGGACT TTCCTACTTG GCAGTACATC TACGTATTAG  
1561 TCATCGCTAT TACCATGGTG ATGCGGTTTT GGCAGTACAT CAATGGGCGT GGATAGCGGT  
1621 TTGACTCAG GGGATTTCCA AGTCTCCACC CCATTGACGT CAATGGGAGT TTGTTTTGGC  
1681 ACCAAAATCA ACGGGACTTT CCAAATGTC GTAACAATC CGCCCCATTG ACGCAAATGG  
1741 GCGGTAGGCG TGTACGGTGG GAGGTCTATA TAAGCAGAGC TCTCTGGCTA ACTAGAGAAC  
1801 CCACTGCTTA CTGGCTTATC GAAATTAATA CGACTCACTA TAGGGAGACC CAAGCTGGCT  
1861 AGCCGCCACC ATGGCCTCCT CCGAGGACGT CATCAAGGAG TTCATGCGCT TCAAGGTGCG  
1921 CATGGAGGGC TCCGTGAACG GCCACGAGTT CGAGATCGAG GCGGAGGGCG AGGGCCGCC  
1981 CTACGAGGGC ACCCAGACCG CCAAGCTGAA GGTGACCAAG GCGGCCCCC TGCCCTTCGC  
2041 CTGGGACATC CTGTCCCCC AGTTCCAGTA CGGCTCCAAG GTGTACGTGA AGCACCPCG  
2101 CGACATCCCC GACTACAAGA AGCTGTCCTT CCCCAGGGC TTCAAGTGGG AGCGCGTGAT  
2161 GAACTTCGAG GACGGCGGCG TGGTGACCGT GACCCAGGAC TCCTCCCTGC AGGACGGCTC  
2221 CTTCATCTAC AAGGTGAAGT TCATCGGCGT GAACTTCCCC TCCGACGGCC CCGTAATGCA  
2281 GAAGAAGACT ATGGGCTGGG AGGCCTCCAC CGAGCGCTG TACCCCGCG ACGCGTGCT  
2341 GAAGGGCGAG ATCCACAAGG CCCTGAAGCT GAAGGACGGC GGCCACTACC TGGTGGAGTT  
2401 CAAGTCCATC TACATGGCCA AGAAGCCCGT GCAGCTGCCG GGCTACTACT ACGTGGACTC  
2461 CAAGCTGGAC ATCACCTCCC ACAACGAGGA CTACACCATC GTGGAGCAGT ACGAGCGCGC  
2521 CGAGGGCCGC CACCACCTGT TCCTGTAGAC GGCTGTTTAA ACCCGCTGAT CAGCCTCGAC  
2581 TGTGCCCTTCT AGTTGCCAGC CATCTGTTGT TTGCCCTCC CCCGTGCCTT CTTGACCCT  
2641 GGAAGGTGCC ACTCCCCTG TCCTTTTCTA ATAAAATGAG GAAATTGCAT CGCATTGTCT  
2701 GAGTAGGTGT CATTCTATTC TGGGGGGTGG GGTGGGGCAG GACAGCAAGG GGGAGGATG



2761 GGAAGACAAT AGCAGGCATG CTGGGGATGC GGTGGGCTCT ATGGCTTCTG AGGCGGAAAAG  
2821 AACCAGCTGG GGCTCTAGGG GGTATCCCCA CGCGCCCTGT AGCGGCGCAT TAAGCGCGGC  
2881 GGGTGTGGTG GTTACGCGCA GCGTGACCGC TACACTTGCC AGCGCCCTAG CGCCCCTCC  
2941 TTTCGCTTTC TTCCCTTCCT TTCTCGCCAC GTTCGCCGGC TTTCCCCGTC AAGCTCTAAA  
3001 TCGGGGGCTC CTTTATAGGT FCCGATTTAG TGCTTTACGG CACCTCGACC CCAAAAAACT  
3061 TGATTAGGGT GATGGTTCAC GTAGTGGGCC ATCGCCCTGA TAGACGGTTT TTCGCCCTTT  
3121 GACGTTGGAG TCCACGTTCT TTAATAGTGG ACTCTTGTTT CAAACTGGAA CAACACTCAA  
3181 CCCTATCTCG GTCTATTCTT TTGATTTATA AGGGATTTTG CCGATTTCCG CCTATTGGTT  
3241 AAAAAATGAG CTGATTTAAC AAAAAATTTAA CGCGAATTAA TTCTGTGGAA TGTGTGTCAG  
3301 TTAGGGTGTG GAAAGTCCCC AGGCTCCCCA GCAGGCAGAA GTATGCAAAG CATGCATCTC  
3361 AATTAGTCAG CAACCAGGTG TGGAAAAGTCC CCAGGCTCCC CAGCAGGCAG AAGTATGCAA  
3421 AGCATGCATC TCAATTAGTC AGCAACCATA GTCCCGCCCC TAACTCCGCC CATCCCGCCC  
3481 CTAACTCCGC CCAGTTCCGC CCATTCTCCG CCCCATGGCT GACTAATTTT TTTTATTTAT  
3541 GCAGAGGCCG AGGCCGCCCTC TGCCTCTGAG CTATTCCAGA AGTAGTGAGG AGGCTTTTTT  
3601 GGAGGCCTAG GCTTTTGCAA AAAGCTCCCG GGAGCTTGTA TATCCATTTT CGGATCTGAT  
3661 CAAGAGACAG GATGAGGATC GTTTCGCATG ATTGAACAAG ATGGATTGCA CGCAGGTTCT  
3721 CCGGCCGCTT GGGTGGAGAG GCTATTCCGC TATGACTGGG CACAACAGAC AATCGGCTGC  
3781 TCTGATGCCG CCGTGTTCGG GCTGTACAGC CAGGGGCGCC CGGTTCTTTT TGTCAAGACC  
3841 GACCTGTCCG GTGCCCTGAA TGAAGTGCAG GACGAGGCAG CGCGGCTATC GTGGCTGGCC  
3901 ACGACGGGCG TTCTTGCCGC AGCTGTGCTC GACGTTGTCA CTGAAGCGGG AAGGGACTGG  
3961 CTGCTATTGG GCGAAGTGCC GGGGCAGGAT CTCCTGTCACT CTCACCTTGC TCCTGCCGAG  
4021 AAAGTATCCA TCATGGCTGA TGCAATGCGG CGGCTGCATA CGCTTGATCC GGCTACCTGC  
4081 CCATTCGACC ACCAAGCGAA ACATCGCATC GAGCGAGCAC GTACTCGGAT GGAAGCCGGT  
4141 CTTGTGATC AGGATGATCT GGACGAAGAG CATCAGGGGC TCGCGCCAGC CGAACTGTTC  
4201 GCCAGGCTCA AGGCCGCGCAT GCCCGACGGC GAGGATCTCG TCGTGACCCA TGCCGATGCC  
4261 TGCTTGCCGA ATATCATGGT GGAAAATGGC CGCTTTTCTG GATTCATCGA CTGTGGCCGG  
4321 CTGGGTGTGG CGGACCGCTA TCAGGACATA GCGTTGGCTA CCCGTGATAT TGCTGAAGAG  
4381 CTTGGCGGCG AATGGGCTGA CCGCTTCCTC GTGCTTTACG GTATCGCCGC TCCCGATTCC  
4441 CAGCGCATCG CCTTCTATCG CCTTCTTGAC GAGTCTTCTT GAGCGGGACT CTGGGGTTCC  
4501 AAATGACCGA CCAAGCGACG CCCAACCTGC CATCACGAGA TTTTCGATTCC ACCGCCGCTT  
4561 TCTATGAAAG GTTGGGCTTC GGAATCGTTT TCCGGGACGC CGGCTGGATG ATCCTCCAGC  
4621 GCGGGGATCT CATGCTGGAG TTCTTCGCCC ACCCCAATT GTTTATTGCA GCTTATAATG  
4681 GTTACAAATA AAGCAATAGC ATCACAAATT TCACAAATA AGCATTTTTT TCACTGCATT  
4741 CTAGTTGTGG TTTGTCCAAA CTCATCAATG TATCTTATCA TGTCTGTATA CCGTCGACCT  
4801 CTAGCTAGAG CTTGGCGTAA TCATGGTCAT AGCTGTTTCC TGTGTGAAAT TGTATCCGC  
4861 TCACAATTCC ACACAACATA CGAGCCGGAA GCATAAAGTG TAAAGCCTGG GGTGCCAAT  
4921 GAGTGAGCTA ACTCACATTA ATTGCGTTGC GCTCACTGCC CGCTTTCCAG TCGGAAACC  
4981 TGTGCTGCCA GCTGCATTAA TGAATCGGCC AACGCGCGG GAGAGGCGGT TTGCGTATTG  
5041 GCGCTCTTTC CGCTTCCTCG CTCACTGACT CGCTGCGCTC GGTCGTTCCG CTGCGGCGAG  
5101 CGGTATCAGC TCACTCAAAG GCGGTAATAC GGTATCCAC AGAATCAGGG GATAACGCAG  
5161 GAAAGAACAT GTGAGCAAAA GGCCAGCAAA AGGCCAGGAA CCGTAAAAAG GCCGCTTTC  
5221 TGGCGTTTTT CCATAGGCTC CGCCCCCTG ACGAGCATCA CAAAAATCGA CGCTCAAGTC  
5281 AGAGGTGGCG AAACCCGACA GGACTATAAA GATACCAGGC GTTTCCCCCT GGAAGCTCCC  
5341 TCGTGCGCTC TCCTGTTCCG ACCCTGCCGC TTACCGGATA CCTGTCCGCC TTTCTCCCTT  
5401 CGGGAAGCGT GGCGCTTCTT CATAGCTCAC GCTGTAGGTA TCTCAGTTCG GTGTAGGTCG  
5461 TTCGCTCCAA GCTGGGCTGT GTGCACGAAC CCCCCTTCA GCCCGACCGC TGCGCTTAT  
5521 CCGGTAAC TAAGTCTGAG TCCAACCCGG TAAGACACGA CTTATCGCCA CTGGCAGCAG  
5581 CCACTGGTAA CAGGATTAGC AGAGCGAGGT ATGTAGGCGG TGCTACAGAG TTCTTGAAGT

5641 GGTGGCCTAA CTACGGCTAC ACTAGAAGAA CAGTATTTGG TATCTGCGCT CTGCTGAAGC  
5701 CAGTTACCTT CGGAAAAAGA GTTGGTAGCT CTTGATCCGG CAAACAAACC ACCGCTGGTA  
5761 GCGGTTTTTT TGTTTGCAAG CAGCAGATTA CGCGCAGAAA AAAAGGATCT CAAGAAGATC  
5821 CTTTGATCTT TTCTACGGGG TCTGACGCTC AGTGGAACGA AAACACACGT TAAGGGATTT  
5881 TGGTCATGAG ATTATCAAAA AGGATCTTCA CCTAGATCCT TTTAAATTAA AAATGAAGTT  
5941 TTAAATCAAT CTAAAGTATA TATGAGTAAA CTTGGTCTGA CAGTTACCAA TGCTTAATCA  
6001 GTGAGGCACC TATCTCAGCG ATCTGTCTAT TTCGTTTCATC CATAGTTGCC TGACTCCCCG  
6061 TCGTGTAGAT AACTACGATA CGGGAGGGCT TACCATCTGG CCCCAGTGCT GCAATGATAC  
6121 CGCGAGACCC ACGCTCACCG GCTCCAGATT TATCAGCAAT AAACCAGCCA GCCGGAAGGG  
6181 CCGAGCGCAG AAGTGGTCTT GCAACTTTAT CCGCCTCCAT CCAGTCTATT AATTGTTGCC  
6241 GGGAAAGCTAG AGTAAGTAGT TCGCCAGTTA ATAGTTTGCG CAACGTTGTT GCCATTGCTA  
6301 CAGGCATCGT GGTGTCACGC TCGTCGTTTG GTATGGCTTC ATTCAGCTCC GGTTCCCAAC  
6361 GATCAAGGCG AGTTACATGA TCCCCCATGT TGTGCAAAA AGCGGTTAGC TCCTTCGGTC  
6421 CTCCGATCGT TGTCAGAAGT AAGTTGGCCG CAGTGTTATC ACTCATGGTT ATGGCAGCAC  
6481 TGCATAATTC TCTTACTGTC ATGCCATCCG TAAGATGCTT TTCTGTGACT GGTGAGTACT  
6541 CAACCAAGTC ATTCTGAGAA TAGTGTATGC GGCGACCGAG TTGCTCTTGC CCGCGCTCAA  
6601 TACGGGATAA TACCGCGCCA CATAGCAGAA CTTTAAAAGT GCTCATCATT GGAAAACGTT  
6661 CTTCCGGGCG AAAACTCTCA AGGATCTTAC CGCTGTTGAG ATCCAGTTCG ATGTAACCCA  
6721 CTCGTGCACC CAACTGATCT TCAGCATCTT TTACTTTCAC CAGCGTTTCT GGGTGAGCAA  
6781 AAACAGGAAG GCAAAATGCC GCAAAAAGG GAATAAGGGC GACACGGAAA TGTGGAATAC  
6841 TCATACTCTT CCTTTTCAA TATTATTGAA GCATTTATCA GGGTTATTGT CTCATGAGCG  
6901 GATACATATT TGAATGTATT TAGAAAAATA AACAAATAGG GGTTCGCGC ACATTTCCCC  
6961 GAAAAGTGCC ACCTGACGTC

//

13..179 4xHRE  
32..62 HREv2 consensus #1  
71..101 HREv2 consensus #2  
110..140 HREv2 consensus #3  
149..179 HREv2 consensus #4  
197..221 Minimal Promoter – YB\_TATA  
269..826 Gaussia Luciferase  
871..1095 bGHpA  
1195..1752 CMV  
1871..2548 dsRed Express  
2580..2804 bGHpA  
2850..3278 fl ori  
3283..3653 SV40 Early Promoter  
3688..4482 NeoR  
4656..4787 SV40 PA  
5840..5169 pUC  
6844..5984 AmpR  
6943..6845 Bla Promoter

### Supplementary Text 3. Plasmid Sequence for JREIL6x4-YB\_TATA-Gluc

```
1 GACGGATCGG GAGATCTTCG CGATTAATTA AGCGCTTCCT GACAGTGACG CGAGCCGGCG
61 ATTAAGCGCT TCCTGACAGT GACGCGAGCC GGCATTAAAG CGCTTCCTGA CAGTGACGCG
121 AGCCGGCGAT TAAGCGCTTC CTGACAGTGA CGCGAGCCGG CGATTAATCC ATATGCTCTA
181 GAGGGTATAT AATGGGGGCC ACTAGTCTAC TACCAGAAAG CTTGGTACCG AGCTCGGATC
241 CAGCCACCAT GGGAGTCAAA GTTCTGTTTG CCCTGATCTG CATCGCTGTG GCCGAGGCCA
301 AGCCACCGA GAACAACGAA GACTTCAACA TCGTGCCGT GGCAGCAAC TTCGCGACCA
361 CGGATCTCGA TGCTGACCGC GGAAGTTGC CCGCAAGAA GCTGCCGCTG GAGGTGCTCA
421 AAGAGATGGA AGCCAATGCC CGGAAAGCTG GCTGCACCAG GGGCTGTCTG ATCTGCCTGT
481 CCCACATCAA GTGCACGCCC AAGATGAAGA AGTTCATCCC AGGACGCTGC CACACCTACG
541 AAGGCGACAA AGAGTCCGCA CAGGGCGGCA TAGGCGAGGC GATCGTCGAC ATTCCTGAGA
601 TTCCTGGGTT CAAGGACTTG GAGCCATGG AGCAGTTCAT CGCACAGGTC GATCTGTGTG
661 TGGACTGCAC AACTGGCTGC CTCAAAGGGC TTGCCAACGT GCAGTGTCT GACCTGCTCA
721 AGAAGTGGCT GCCCAACGC TGTGCGACCT TTGCCAGCAA GATCCAGGGC CAGGTGGACA
781 AGATCAAGGG GGCCGGTGGT GACTAAGCGG CCGCTAGAG GGCCCGTTTA AACCCGCTGA
841 TCAGCCTCGA CTGTGCCTTC TAGTTGCCAG CCATCTGTTG TTTGCCCTC CCCCCTGCCT
901 TCCTTGACCC TGGAAGGTGC CACTCCCCT GTCCTTCTCT AATAAAATGA GGAAATTGCA
961 TCGCATTGTC TGAGTAGGTG TCATTCTATT CTGGGGGGTG GGGTGGGGCA GGACAGCAAG
1021 GGGGAGGATT GGAAGACAA TAGCAGGCAT GCTGGGGATG CGGTGGGCTC TATGCCCGCG
1081 GAATTAGCCT ATGTTTTTTG GAACAATTGC ATGAAGAATC TGCTTAGGGT TAGCGTTTTT
1141 GCGCTGCTTC GCGATGTACG GGCCAGATAT ACGCGTTGAC ATTGATTATT GACTAGTTAT
1201 TAATAGTAAT CAATTACGGG GTCATTAGTT CATAGCCCAT ATATGGAGTT CCGCGTTACA
1261 TAACTTACGG TAAATGGCCC GCCTGGCTGA CCGCCCAACG ACCCCCGCCC ATTGACGTCA
1321 ATAATGACGT ATGTTCCCAT AGTAACGCCA ATAGGGACTT TCCATTGACG TCAATGGGTG
1381 GAGTATTTAC GGTAAACTGC CCACTTGGA GTACATCAAG TGTATCATAT GCCAAGTACG
1441 CCCCTATTG ACGTCAATGA CGGTAAATGG CCCGCTGGC ATTATGCCCA GTACATGACC
1501 TTATGGGACT TTCCTACTTG GCAGTACATC TACGTATTAG TCATCGCTAT TACCATGGTG
1561 ATGCGGTTTT GGCAGTACAT CAATGGGCGT GGATAGCGGT TTGACTCAG GGGATTTCCA
1621 AGTCTCCACC CCATTGACGT CAATGGGAGT TTGTTTTGGC ACCAAAATCA ACGGGACTTT
1681 CAAAATGTC GTAACAACCT CGCCCCATTG ACGCAAATGG GCGGTAGGCG TGTACGGTGG
1741 GAGGTCTATA TAAGCAGAGC TCTCTGGCTA ACTAGAGAAC CCACTGCTTA CTGGCTTATC
1801 GAAATTAATA CGACTCACTA TAGGGAGACC CAAGCTGGCT AGCCGCCACC ATGGCTCCT
1861 CCGAGGACGT CATCAAGGAG TTCATGCGCT TCAAGGTGCG CATGGAGGGC TCCGTGAACG
1921 GCCACGAGTT CGAGATCGAG GGCGAGGGCG AGGGCCGCC CTACGAGGGC ACCCAGACCG
1981 CCAAGCTGAA GGTGACCAAG GGCGGCCCC TGCCCTTCGC CTGGGACATC CTGTCCCCC
2041 AGTTCCAGTA CGGCTCCAAG GTGTACGTGA AGCACCCCGC CGACATCCCC GACTACAAGA
2101 AGCTGTCTTT CCCCAGGGC TTCAAGTGGG AGCGCGTGAT GAACTTCGAG GACGGCGGCG
2161 TGGTGACCGT GACCCAGGAC TCCTCCCTGC AGGACGGCTC CTTTATCTAC AAGGTGAAAGT
2221 TCATCGGCGT GAAC'TCCCC TCCGACGGCC CCGTAATGCA GAAGAAGACT ATGGGCTGGG
2281 AGGCCTCCAC CGAGCGCCTG TACCCCGCG ACGGCGTGCT GAAGGGCGAG ATCCACAAGG
2341 CCCTGAAGCT GAAGGACGGC GGCCACTACC TGGTGGAGTT CAAGTCCATC TACATGGCCA
2401 AGAAGCCCGT GCAGCTGCCC GGCTACTACT ACGTGGACTC CAAGCTGGAC ATCACC'TCCC
2461 ACAACGAGGA CTACACCATC GTGGAGCAGT ACGAGCGCGC CGAGGGCCGC CACCACCTGT
2521 TCCTGTAGAC GGCTGTTTAA ACCCGCTGAT CAGCCTCGAC TGTGCCTTCT AGTTGCCAGC
2581 CATCTGTTGT TTGCCCTCC CCCGTGCCTT CTTGACCCT GGAAGGTGCC ACTCCACTG
2641 TCCTTCTCTA AATAAAATGAG GAAATTGCAT CGCATTGTCT GAGTAGGTGT CATTCTATTC
2701 TGGGGGGTGG GGTGGGGCAG GACAGCAAGG GGGAGGATTG GGAAGACAAT AGCAGGCATG
```

2761 CTGGGGATGC GGTGGGCTCT ATGGCTTCTG AGGCGGAAAAG AACCAGCTGG GGCTCTAGGG  
2821 GGTATCCCCA CGCGCCCTGT AGCGGCAT TAAGCGCGGC GGGTGTGGTG GTTACGCGCA  
2881 GCGTGACCGC TACACTTGCC AGCGCCCTAG CGCCCGCTCC TTTCGCTTTC TTCCCTTCTT  
2941 TTCTCGCCAC GTTCGCCGGC TTTCCCGTTC AAGCTCTAAA TCGGGGGCTC CCTTTAGGGT  
3001 TCCGATTTAG TGCTTTACGG CACCTCGACC CCAAAAAACT TGATTAGGGT GATGGTTCAC  
3061 GTAGTGGGCC ATCGCCCTGA TAGACGGTTT TTCGCCCTTT GACGTTGGAG TCCACGTTCT  
3121 TTAATAGTGG ACTCTTGTTT CAAACTGGAA CAACACTCAA CCCTATCTCG GTCTATTCTT  
3181 TTGATTTATA AGGGATTTTG CCGATTTTCGG CCTATTGGTT AAAAAATGAG CTGATTTAAC  
3241 AAAAATTTAA CGCGAATTAA TTCTGTGGAA TGTGTGTCAG TTAGGGTGTG GAAAGTCCCC  
3301 AGGCTCCCCA GCAGGCAGAA GTATGCAAAG CATGCATCTC AATTAGTCAG CAACCAGGTG  
3361 TGGAAAAGTCC CCAGGCTCCC CAGCAGGCAG AAGTATGCAA AGCATGCATC TCAATTAGTC  
3421 AGCAACCATA GTCCCGCCCC TAACTCCGCC CATCCCGCCC CTAACTCCGC CCAGTTCCGC  
3481 CCATTCTCCG CCCCATGGCT GACTAATTTT TTTTATTTAT GCAGAGGCCG AGGCCGCCCTC  
3541 TGCCTCTGAG CTATTCCAGA AGTAGTGAGG AGGCTTTTTT GGAGGCCTAG GCTTTTGCAA  
3601 AAAGCTCCCG GGAGCTTGTA TATCCATTTT CGGATCTGAT CAAGAGACAG GATGAGGATC  
3661 GTTTCGCATG ATTGAACAAG ATGGATTGCA CGCAGGTTCT CCGGCCGCTT GGGTGGAGAG  
3721 GCTATTCGGC TATGACTGGG CACAACAGAC AATCGGCTGC TCTGATGCCG CCGTGTTCGG  
3781 GCTGTCAGCG CAGGGGCGCC CGGTTCTTTT TGTCAAGACC GACCTGTCCG GTGCCCTGAA  
3841 TGAAGTGCAG GACGAGGCAG CGCGGCTATC GTGGCTGGCC ACGACGGGCG TTCCTTGCGC  
3901 AGCTGTGCTC GACGTTGTCA CTGAAGCGGG AAGGGACTGG CTGCTATTGG GCGAAGTGCC  
3961 GGGGCAGGAT CTCCTGTCTC CTCACCTTGC TCCTGCCGAG AAAGTATCCA TCATGGCTGA  
4021 TGCAATGCGG CGGCTGCATA CGCTTGATCC GGCTACCTGC CCATTTCGACC ACCAAGCGAA  
4081 ACATCGCATC GAGCGAGCAC GTACTCGGAT GGAAGCCGGT CTTGTGCGATC AGGATGATCT  
4141 GGACGAAGAG CATCAGGGGC TCGCGCCAGC CGAACTGTTT GCCAGGCTCA AGGCAGCAT  
4201 GCCCCAGCGC GAGGATCTCG TCGTGACCCA TGGCGATGCC TGCTTGCCGA ATATCATGGT  
4261 GGAAAATGGC CGCTTTTCTG GATTCATCGA CTGTGGCCGG CTGGGTGTGG CCGACCCTA  
4321 TCAGGACATA GCGTTGGCTA CCCGTGATAT TGCTGAAGAG CTTGGCGGCG AATGGGCTGA  
4381 CCGCTTCTC GTGCTTTACG GTATCGCCGC TCCCATTTCG CAGCGCATCG CCTTCTATCG  
4441 CCTTCTTGAC GAGTCTTCTT GAGCGGGACT CTGGGGTTCG AAATGACCGA CCAAGCGACG  
4501 CCCAACCTGC CATCACGAGA TTTTCGATTCC ACCGCCGCCT TCTATGAAAG GTTGGGCTTC  
4561 GGAATCGTTT TCCGGGACGC CGGCTGGATG ATCCTCCAGC GCGGGGATCT CATGCTGGAG  
4621 TTCTTCGCCC ACCCCAACTT GTTTATTGCA GCTTATAATG GTTACAAATA AAGCAATAGC  
4681 ATCACAAATT TCACAAATAA AGCATTTTTT TCACTGCATT CTAGTTGTGG TTTGTCCAAA  
4741 CTCATCAATG TATCTTATCA TGTCTGTATA CCGTCGACCT CTAGCTAGAG CTTGGCGTAA  
4801 TCATGGTCAT AGCTGTTTCC TGTGTGAAAT TGTATCCGC TCACAATTCC ACACAACATA  
4861 CGAGCCGAA GCATAAAGTG TAAAGCCTGG GGTGCCTAAT GAGTGAGCTA ACTCACATTA  
4921 ATTGCGTTGC GCTCACTGCC CGCTTTCAG TCGGAAACC TGTGCTGCCA GCTGCATTAA  
4981 TGAATCGGCC AACGCGCGGG GAGAGGCGGT TTGCGTATFG GCGCTCTTC CGCTTCTCG  
5041 CTCACTGACT CGCTGCGCTC GGTGTTTCGG CTGCGGCGAG CGGTATCAGC TCACTCAAAG  
5101 GCGGTAATAC GGTTATCCAC AGAATCAGGG GATAACGCAG GAAAGAACAT GTGAGCAAAA  
5161 GGCCAGCAAA AGGCCAGGAA CCGTAAAAAG GCCGCTTGC TGGCGTTTTT CCATAGGCTC  
5221 CGCCCCCTG ACGAGCATCA CAAAAATCGA CGCTCAAGTC AGAGGTGGCG AAACCCGACA  
5281 GGAATAAAA GATACCAGGC GTTTCCCCCT GGAAGCTCCC TCGTGCCTC TCCTGTTCGG  
5341 ACCCTGCCGC TTACCGGATA CCTGTCCGCC TTTCTCCCTT CGGGAAGCGT GGCGCTTCT  
5401 CATAGCTCAC GCTGTAGGTA TCTCAGTTCC GTGTAGGTCG TTCGCTCCAA GCTGGGCTGT  
5461 GTGCACGAAC CCCCCTTCA GCCCGACCGC TGCGCCTTAT CCGGTAACATA TCGTCTTGAG  
5521 TCCAACCCGG TAAGACACGA CTTATCGCCA CTGGCAGCAG CCACTGGTAA CAGGATTAGC  
5581 AGAGCGAGGT ATGTAGGCGG TGCTACAGAG TTCTTGAAGT GGTGGCCTAA CTACGGCTAC

5641 ACTAGAAGAA CAGTATTTGG TATCTGCGCT CTGCTGAAGC CAGTTACCTT CGGAAAAAGA  
 5701 GTTGGTAGCT CTTGATCCGG CAAACAAACC ACCGCTGGTA GCGGTTTTTT TGTTCGCAAG  
 5761 CAGCAGATTA CGCGCAGAAA AAAAGGATCT CAAGAAGATC CTTTGATCTT TTCTACGGGG  
 5821 TCTGACGCTC AGTGGAACGA AAACCTCACGT TAAGGGATT TGGTCATGAG ATTATCAAAA  
 5881 AGGATCTTCA CCTAGATCCT TTTAAATTAA AAATGAAGTT TTAAATCAAT CTAAAGTATA  
 5941 TATGAGTAAA CTTGGTCTGA CAGTTACCAA TGCTTAATCA GTGAGGCACC TATCTCAGCG  
 6001 ATCTGTCTAT TTCGTTTCAT CATAGTTGCC TGACTCCCCG TCGTGTAGAT AACTACGATA  
 6061 CGGGAGGGCT TACCATCTGG CCCCAGTGCT GCAATGATAC CGCGAGACCC ACGCTCACCG  
 6121 GCTCCAGATT TATCAGCAAT AAACCAGCCA GCCGGAAGGG CCGAGCGCAG AAGTGGTCCT  
 6181 GCAACTTTAT CCGCTCCAT CCAGTCTATT AATTGTTGCC GGAAGCTAG AGTAAGTAGT  
 6241 TCGCCAGTTA ATAGTTTGGC CAACGTTGTT GCCATTGCTA CAGGCATCGT GGTGTCACGC  
 6301 TCGTCGTTTG GTATGGCTTC ATTCAGCTCC GGTTCCCAAC GATCAAGGCG AGTTACATGA  
 6361 TCCCCATGT TGTGCAAAAA AGCGGTTAGC TCCTTCGGTC CTCCGATCGT TGTCAGAAGT  
 6421 AAGTTGGCCG CAGTGTATC ACTCATGGTT ATGGCAGCAC TGCATAATTC TCTTACTGTC  
 6481 ATGCCATCCG TAAGATGCTT TTCTGTGACT GGTGAGTACT CAACCAAGTC ATTCGAGAA  
 6541 TAGTGTATGC GGCGACCGAG TTGCTCTTGC CCGGCGTCAA TACGGGATAA TACCGCGCCA  
 6601 CATAGCAGAA CTTTAAAAGT GCTCATCATT GGAAAACGTT CTTCGGGGCG AAAACTCTCA  
 6661 AGGATCTTAC CGCTGTTGAG ATCCAGTTCG ATGTAACCCA CTCGTGCACC CACTGATCT  
 6721 TCAGCATCTT TTACTTTCAC CAGCGTTTCT GGGTGAGCAA AAACAGGAAG GCAAAATGCC  
 6781 GCAAAAAAGG GAATAAGGGC GACACGGAAA TGTGAATAC TCATACTCTT CCTTTTCAA  
 6841 TATTATTGAA GCATTTATCA GGGTTATTGT CTCATGAGCG GATACATATT TGAATGTATT  
 6901 TAGAAAAATA AACAAATAGG GGTTCGCGC ACATTTCCCC GAAAAGTGCC ACCTGACGTC

//

32..159 4xJRE-IL6  
 32..57 JRE-IL6 Response Element #1  
 66..91 JRE-IL6 Response Element #2  
 100..125 JRE-IL6 Response Element #3  
 134..159 JRE-IL6 Response Element #4  
 177..201 Minimal Promoter – YB\_TATA  
 249..806 Gaussia Luciferase  
 851..1075 bGHpA  
 1175..1732 CMV  
 1851..2528 dsRed Express  
 2560..2784 bGHpA  
 2830..3258 fl ori  
 3263..3633 SV40 Early Promoter  
 3668..4462 NeoR  
 4636..4767 SV40 PA  
 5820..5149 pUC ori  
 6824..5964 AmpR  
 6923..6825 Bla Promoter
